# Supplementary material for: Biotic stress accelerates formation of climate-relevant aerosols in boreal forests
Source: Copernicus journal article supplement (doi:10.5194/acp-15-12139-2015), 2015-11-02
Supplement: Supplementary file 1 [file acp-15-12139-2015-supplement.pdf]

Supplement of Atmos. Chem. Phys., 15, 12139–12157, 2015  
<http://www.atmos-chem-phys.net/15/12139/2015/>  
doi:10.5194/acp-15-12139-2015-supplement  
© Author(s) 2015. CC Attribution 3.0 License.

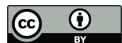

*Supplement of*

## **Biotic stress accelerates formation of climate-relevant aerosols in boreal forests**

**J. Joutsensaari et al.**

*Correspondence to:* J. Joutsensaari (jorma.joutsensaari@uef.fi)

The copyright of individual parts of the supplement might differ from the CC-BY 3.0 licence.

## Supplementary material

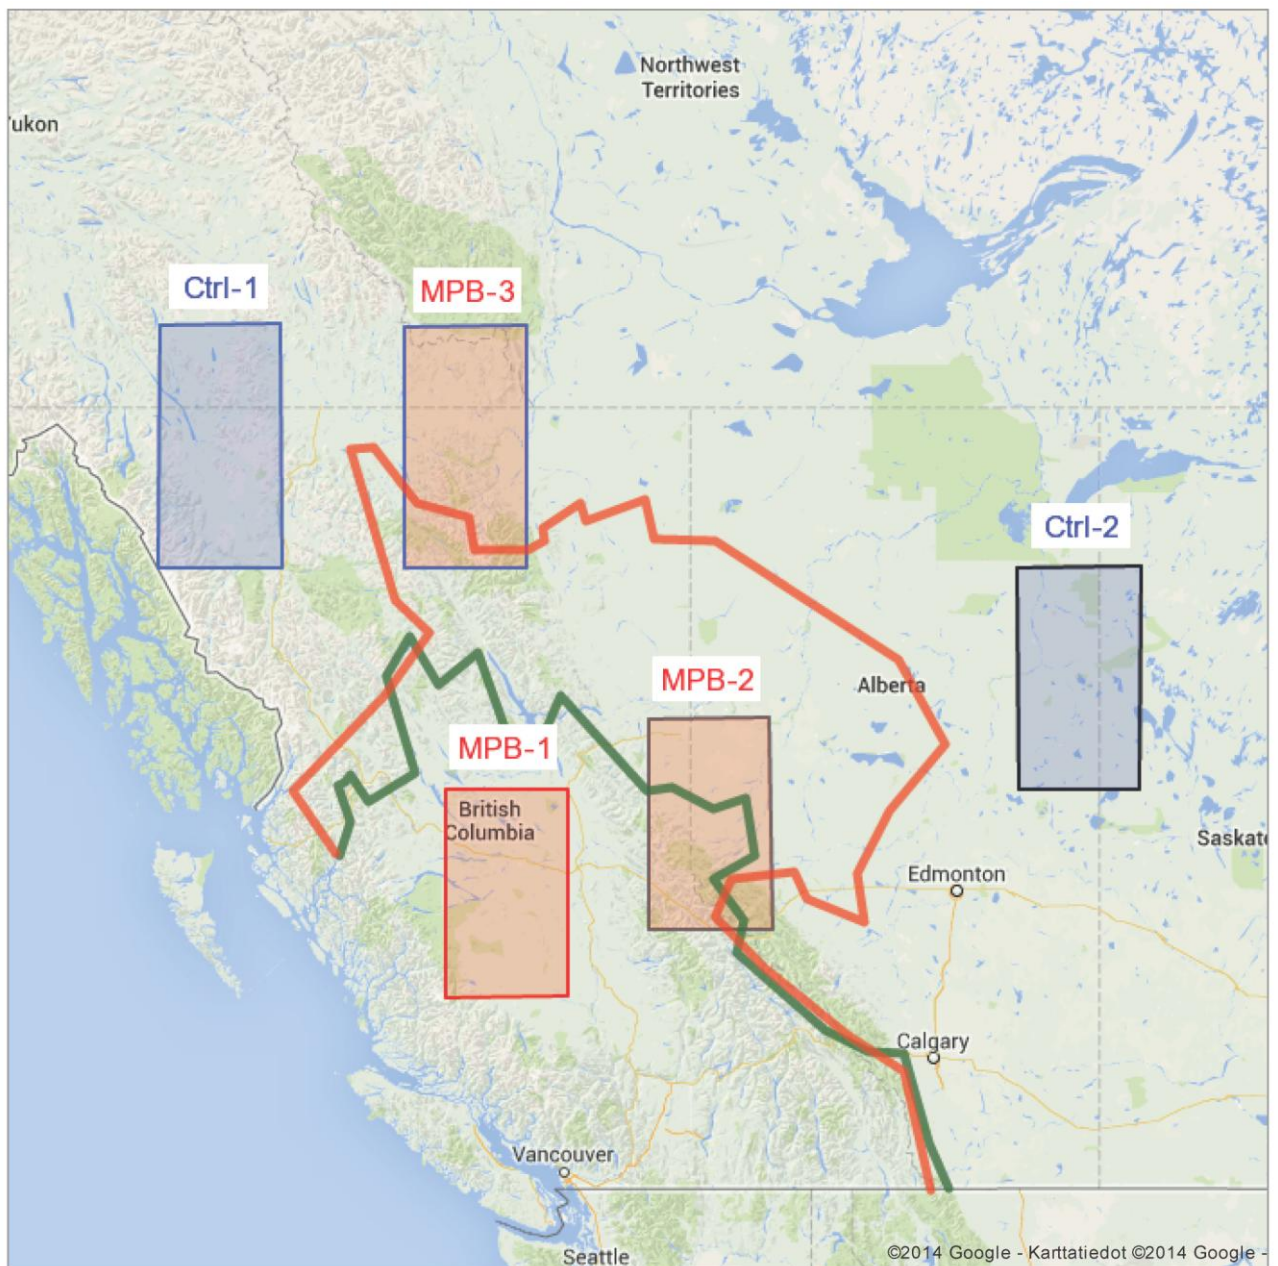

**Figure S1.** A map of the mountain pine beetle (MPB) outbreak areas for AOD analysis. The map is also shown at the web-page <http://goo.gl/maps/m4lO5>. The leading edges of the outbreak in 2006 and 2011 are shown by green and red lines, respectively (roughly reproduced based on MPB displacement data discovered by Natural Resources Canada, see <http://www.nrcan.gc.ca/forests/insects-diseases/13381>).

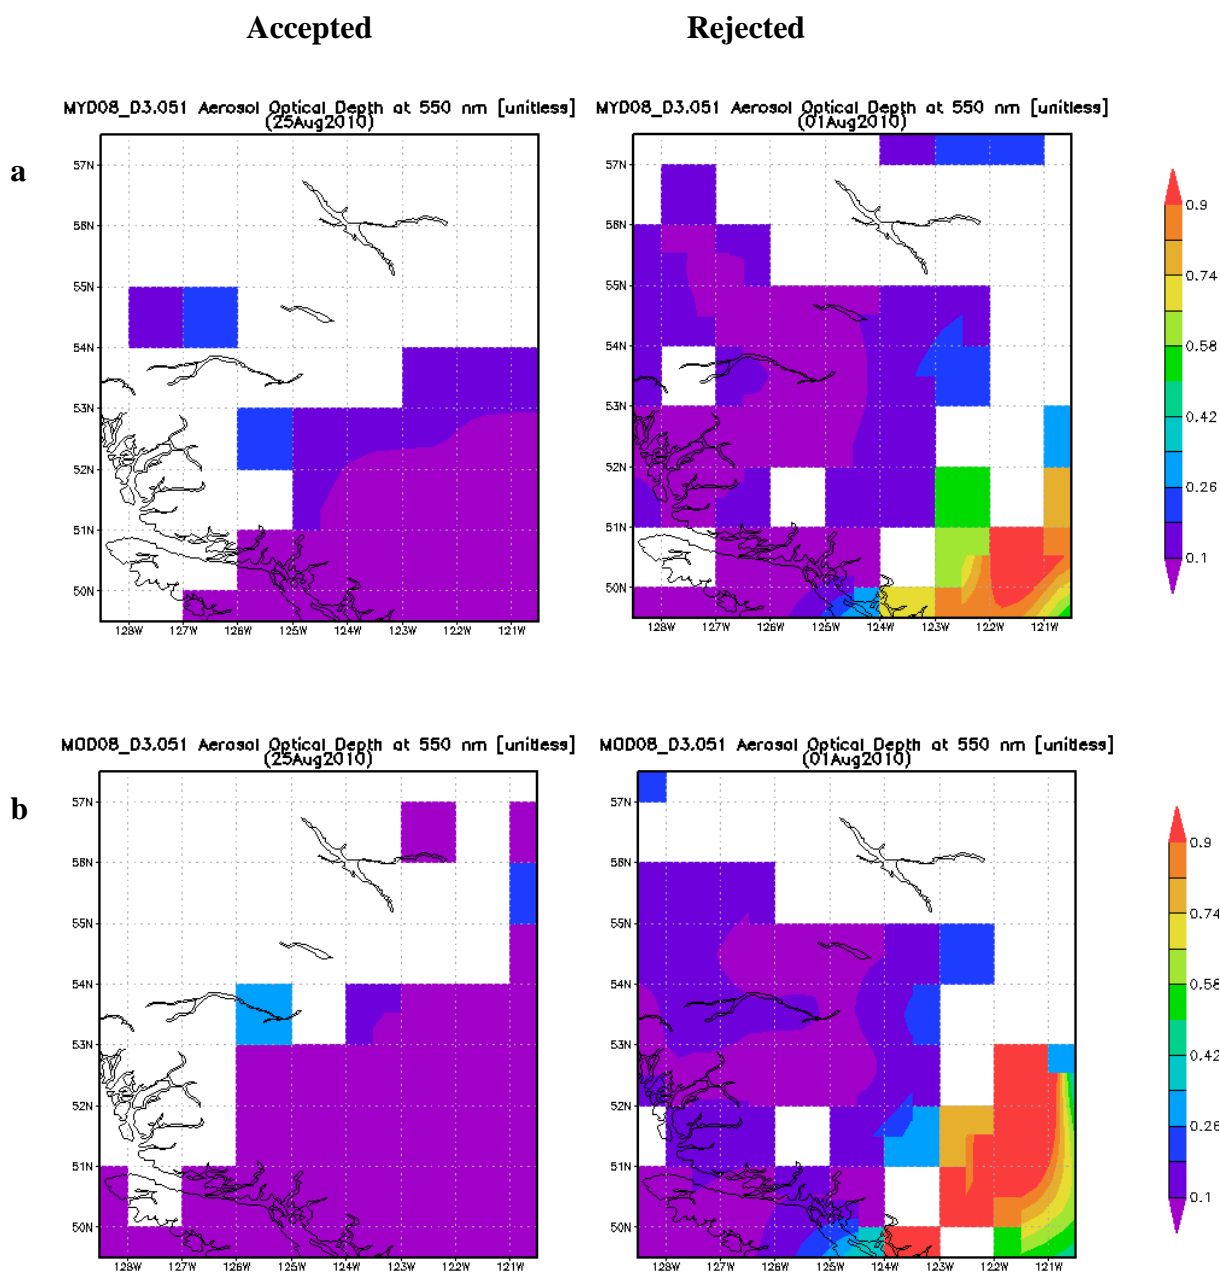

**Figure S2.** Examples of an accepted day (25 Aug 2010) and an excluded/rejected day (1 Aug 2010) due to an evidence of forest fire aerosols in MODIS analysis. AOD results from **a)** Aqua and **b)** from Terra satellites. A clear increase in AOD values due to forest fires was observed in the 1-Aug -2010 data (lower left corners in the rejected figures). MPB-1 3x3 pixel area (N 52°-55°, W 123°-126°) is in the middle of 9x9 pixel areas shown in the figures.

**Table S1.** Days excluded in the AOD analysis due to any evidence of forest fire aerosols for different analyzed areas and Terra and Aqua satellites.

| MPB-1     |           | MPB-2     |           | MPB-3     |           | Ctrl-1    |           | Ctrl-2    |           |
|-----------|-----------|-----------|-----------|-----------|-----------|-----------|-----------|-----------|-----------|
| Terra     | Aqua      |
| 07Aug2002 | 06Aug2003 | 07Aug2002 | 03Aug2003 | 06Aug2002 | 01Aug2003 | 02Aug2002 | 08Aug2003 | 07Aug2002 | 08Aug2002 |
| 01Aug2003 | 10Aug2004 | 06Aug2003 | 04Aug2003 | 12Aug2003 | 12Aug2003 | 06Aug2002 | 11Aug2003 | 08Aug2002 | 01Aug2003 |
| 13Aug2004 | 13Aug2004 | 16Aug2003 | 05Aug2003 | 06Aug2004 | 08Aug2004 | 08Aug2003 | 13Aug2003 | 01Aug2003 | 02Aug2003 |
| 14Aug2004 | 14Aug2004 | 18Aug2003 | 06Aug2003 | 09Aug2004 | 09Aug2004 | 07Aug2004 | 07Aug2004 | 02Aug2003 | 03Aug2003 |
| 15Aug2004 | 15Aug2004 | 19Aug2003 | 15Aug2003 | 11Aug2004 | 10Aug2004 | 08Aug2004 | 08Aug2004 | 03Aug2003 | 04Aug2003 |
| 16Aug2004 | 16Aug2004 | 22Aug2003 | 16Aug2003 | 13Aug2004 | 11Aug2004 | 09Aug2004 | 09Aug2004 | 04Aug2003 | 05Aug2003 |
| 17Aug2004 | 17Aug2004 | 13Aug2004 | 17Aug2003 | 14Aug2004 | 12Aug2004 | 10Aug2004 | 10Aug2004 | 05Aug2003 | 06Aug2003 |
| 18Aug2004 | 18Aug2004 | 14Aug2004 | 18Aug2003 | 15Aug2004 | 13Aug2004 | 11Aug2004 | 11Aug2004 | 06Aug2003 | 07Aug2003 |
| 19Aug2004 | 19Aug2004 | 15Aug2004 | 19Aug2003 | 16Aug2004 | 14Aug2004 | 12Aug2004 | 12Aug2004 | 07Aug2003 | 08Aug2003 |
| 12Aug2005 | 12Aug2005 | 16Aug2004 | 20Aug2003 | 17Aug2004 | 15Aug2004 | 13Aug2004 | 13Aug2004 | 08Aug2003 | 09Aug2003 |
| 13Aug2005 | 13Aug2005 | 17Aug2004 | 21Aug2003 | 18Aug2004 | 16Aug2004 | 14Aug2004 | 14Aug2004 | 09Aug2003 | 10Aug2003 |
| 14Aug2005 | 14Aug2005 | 18Aug2004 | 22Aug2003 | 19Aug2004 | 17Aug2004 | 15Aug2004 | 15Aug2004 | 10Aug2003 | 11Aug2003 |
| 21Aug2006 | 05Aug2007 | 19Aug2004 | 23Aug2003 | 11Aug2005 | 18Aug2004 | 16Aug2004 | 16Aug2004 | 11Aug2003 | 12Aug2003 |
| 05Aug2007 | 07Aug2008 | 13Aug2005 | 03Aug2004 | 12Aug2005 | 19Aug2004 | 17Aug2004 | 17Aug2004 | 12Aug2003 | 13Aug2003 |
| 28Aug2007 | 08Aug2008 | 07Aug2006 | 13Aug2004 | 13Aug2005 | 03Aug2005 | 18Aug2004 | 18Aug2004 | 13Aug2003 | 14Aug2003 |
| 07Aug2008 | 09Aug2008 | 17Aug2007 | 14Aug2004 | 14Aug2005 | 11Aug2005 | 19Aug2004 | 19Aug2004 | 14Aug2003 | 15Aug2003 |
| 08Aug2008 | 01Aug2009 | 01Aug2009 | 15Aug2004 | 22Aug2005 | 12Aug2005 | 25Aug2004 | 24Aug2004 | 15Aug2003 | 16Aug2003 |
| 09Aug2008 | 02Aug2009 | 02Aug2009 | 16Aug2004 | 23Aug2005 | 13Aug2005 | 30Aug2004 | 31Aug2004 | 16Aug2003 | 17Aug2003 |
| 28Aug2008 | 03Aug2009 | 03Aug2009 | 17Aug2004 | 01Aug2009 | 14Aug2005 | 01Aug2005 | 02Aug2005 | 17Aug2003 | 18Aug2003 |
| 01Aug2009 | 04Aug2009 | 08Aug2009 | 18Aug2004 | 02Aug2009 | 22Aug2005 | 07Aug2005 | 11Aug2005 | 18Aug2003 | 19Aug2003 |
| 02Aug2009 | 05Aug2009 | 21Aug2009 | 19Aug2004 | 03Aug2009 | 23Aug2005 | 11Aug2005 | 12Aug2005 | 19Aug2003 | 20Aug2003 |
| 03Aug2009 | 06Aug2009 | 28Aug2009 | 08Aug2005 | 04Aug2009 | 01Aug2009 | 12Aug2005 | 13Aug2005 | 20Aug2003 | 21Aug2003 |
| 04Aug2009 | 07Aug2009 | 29Aug2009 | 13Aug2005 | 05Aug2009 | 02Aug2009 | 13Aug2005 | 14Aug2005 | 21Aug2003 | 22Aug2003 |
| 05Aug2009 | 08Aug2009 | 30Aug2009 | 18Aug2006 | 06Aug2009 | 03Aug2009 | 14Aug2005 | 15Aug2005 | 22Aug2003 | 23Aug2003 |
| 06Aug2009 | 09Aug2009 | 31Aug2009 | 22Aug2006 | 07Aug2009 | 04Aug2009 | 15Aug2005 | 16Aug2005 | 23Aug2003 | 24Aug2003 |
| 07Aug2009 | 10Aug2009 | 03Aug2010 | 17Aug2007 | 08Aug2009 | 05Aug2009 | 16Aug2005 | 17Aug2005 | 24Aug2003 | 25Aug2003 |
| 08Aug2009 | 24Aug2009 | 04Aug2010 | 07Aug2008 | 09Aug2009 | 06Aug2009 | 17Aug2005 | 12Aug2008 | 25Aug2003 | 26Aug2003 |
| 09Aug2009 | 28Aug2009 | 05Aug2010 | 09Aug2008 | 28Aug2009 | 07Aug2009 | 01Aug2009 | 01Aug2009 | 26Aug2003 | 27Aug2003 |
| 10Aug2009 | 29Aug2009 | 06Aug2010 | 01Aug2009 | 29Aug2009 | 08Aug2009 | 02Aug2009 | 02Aug2009 | 27Aug2003 | 28Aug2003 |
| 21Aug2009 | 30Aug2009 | 07Aug2010 | 02Aug2009 | 30Aug2009 | 09Aug2009 | 03Aug2009 | 03Aug2009 | 28Aug2003 | 31Aug2003 |

| MPB-1     |           | MPB-2     |           | MPB-3     |           | Ctrl-1    |           | Ctrl-2    |           |
|-----------|-----------|-----------|-----------|-----------|-----------|-----------|-----------|-----------|-----------|
| Terra     | Aqua      |
| 28Aug2009 | 31Aug2009 | 16Aug2010 | 03Aug2009 | 31Aug2009 | 28Aug2009 | 04Aug2009 | 04Aug2009 | 31Aug2003 | 03Aug2004 |
| 29Aug2009 | 01Aug2010 | 17Aug2010 | 07Aug2009 | 02Aug2010 | 29Aug2009 | 05Aug2009 | 05Aug2009 | 03Aug2004 | 04Aug2004 |
| 30Aug2009 | 02Aug2010 | 18Aug2010 | 08Aug2009 | 03Aug2010 | 30Aug2009 | 06Aug2009 | 06Aug2009 | 10Aug2004 | 10Aug2004 |
| 31Aug2009 | 03Aug2010 | 19Aug2010 | 21Aug2009 | 04Aug2010 | 31Aug2009 | 07Aug2009 | 07Aug2009 | 11Aug2004 | 11Aug2004 |
| 01Aug2010 | 04Aug2010 | 20Aug2010 | 28Aug2009 | 05Aug2010 | 02Aug2010 | 08Aug2009 | 08Aug2009 | 12Aug2004 | 12Aug2004 |
| 02Aug2010 | 05Aug2010 | 21Aug2010 | 29Aug2009 | 06Aug2010 | 03Aug2010 | 09Aug2009 | 09Aug2009 | 13Aug2004 | 13Aug2004 |
| 03Aug2010 | 06Aug2010 | 22Aug2010 | 30Aug2009 | 07Aug2010 | 04Aug2010 | 01Aug2010 | 01Aug2010 | 14Aug2004 | 14Aug2004 |
| 04Aug2010 | 07Aug2010 | 09Aug2012 | 31Aug2009 | 15Aug2010 | 05Aug2010 | 02Aug2010 | 02Aug2010 | 15Aug2004 | 15Aug2004 |
| 05Aug2010 | 14Aug2010 | 10Aug2012 | 01Aug2010 | 16Aug2010 | 06Aug2010 | 03Aug2010 | 03Aug2010 | 16Aug2004 | 16Aug2004 |
| 06Aug2010 | 15Aug2010 | 19Aug2012 | 02Aug2010 | 17Aug2010 | 07Aug2010 | 04Aug2010 | 04Aug2010 | 17Aug2004 | 17Aug2004 |
| 07Aug2010 | 16Aug2010 | 21Aug2012 | 03Aug2010 | 18Aug2010 | 15Aug2010 | 05Aug2010 | 05Aug2010 | 18Aug2004 | 18Aug2004 |
| 15Aug2010 | 17Aug2010 | 27Aug2012 | 04Aug2010 | 05Aug2012 | 16Aug2010 | 06Aug2010 | 06Aug2010 | 19Aug2004 | 19Aug2004 |
| 16Aug2010 | 18Aug2010 |           | 05Aug2010 | 09Aug2012 | 17Aug2010 | 07Aug2010 | 07Aug2010 | 20Aug2004 | 20Aug2004 |
| 17Aug2010 | 09Aug2012 |           | 06Aug2010 | 20Aug2012 | 18Aug2010 | 15Aug2010 | 15Aug2010 | 13Aug2005 | 13Aug2005 |
| 18Aug2010 | 10Aug2012 |           | 07Aug2010 | 21Aug2012 | 07Aug2012 | 16Aug2010 | 16Aug2010 | 23Aug2005 | 22Aug2005 |
| 09Aug2012 | 19Aug2012 |           | 15Aug2010 |           | 09Aug2012 | 17Aug2010 | 17Aug2010 | 24Aug2005 | 23Aug2005 |
| 10Aug2012 | 20Aug2012 |           | 16Aug2010 |           | 19Aug2012 | 18Aug2010 | 18Aug2010 | 25Aug2005 | 24Aug2005 |
| 19Aug2012 | 21Aug2012 |           | 17Aug2010 |           | 20Aug2012 | 11Aug2012 | 11Aug2012 | 29Aug2005 | 25Aug2005 |
| 20Aug2012 |           |           | 18Aug2010 |           | 21Aug2012 | 12Aug2012 | 12Aug2012 | 06Aug2006 | 29Aug2005 |
| 21Aug2012 |           |           | 19Aug2010 |           |           | 19Aug2012 | 21Aug2012 | 07Aug2006 | 03Aug2006 |
|           |           |           | 20Aug2010 |           |           |           |           | 08Aug2006 | 04Aug2006 |
|           |           |           | 08Aug2012 |           |           |           |           | 09Aug2006 | 05Aug2006 |
|           |           |           | 09Aug2012 |           |           |           |           | 10Aug2006 | 06Aug2006 |
|           |           |           | 10Aug2012 |           |           |           |           | 29Aug2006 | 07Aug2006 |
|           |           |           | 19Aug2012 |           |           |           |           | 30Aug2006 | 08Aug2006 |
|           |           |           | 20Aug2012 |           |           |           |           | 03Aug2007 | 09Aug2006 |
|           |           |           | 21Aug2012 |           |           |           |           | 04Aug2007 | 10Aug2006 |
|           |           |           | 27Aug2012 |           |           |           |           | 05Aug2007 | 22Aug2006 |
|           |           |           |           |           |           |           |           | 06Aug2007 | 23Aug2006 |
|           |           |           |           |           |           |           |           | 14Aug2007 | 29Aug2006 |
|           |           |           |           |           |           |           |           | 17Aug2007 | 30Aug2006 |
|           |           |           |           |           |           |           |           | 18Aug2007 | 03Aug2007 |
|           |           |           |           |           |           |           |           | 19Aug2007 | 04Aug2007 |

| MPB-1 |      | MPB-2 |      | MPB-3 |      | Ctrl-1 |      | Ctrl-2    |           |
|-------|------|-------|------|-------|------|--------|------|-----------|-----------|
| Terra | Aqua | Terra | Aqua | Terra | Aqua | Terra  | Aqua | Terra     | Aqua      |
|       |      |       |      |       |      |        |      | 20Aug2007 | 05Aug2007 |
|       |      |       |      |       |      |        |      | 30Aug2007 | 06Aug2007 |
|       |      |       |      |       |      |        |      | 31Aug2007 | 07Aug2007 |
|       |      |       |      |       |      |        |      | 07Aug2008 | 08Aug2007 |
|       |      |       |      |       |      |        |      | 08Aug2008 | 17Aug2007 |
|       |      |       |      |       |      |        |      | 09Aug2008 | 18Aug2007 |
|       |      |       |      |       |      |        |      | 10Aug2008 | 19Aug2007 |
|       |      |       |      |       |      |        |      | 11Aug2008 | 20Aug2007 |
|       |      |       |      |       |      |        |      | 18Aug2008 | 29Aug2007 |
|       |      |       |      |       |      |        |      | 19Aug2008 | 10Aug2008 |
|       |      |       |      |       |      |        |      | 20Aug2008 | 18Aug2008 |
|       |      |       |      |       |      |        |      | 26Aug2008 | 19Aug2008 |
|       |      |       |      |       |      |        |      | 27Aug2008 | 20Aug2008 |
|       |      |       |      |       |      |        |      | 01Aug2009 | 01Aug2009 |
|       |      |       |      |       |      |        |      | 02Aug2009 | 02Aug2009 |
|       |      |       |      |       |      |        |      | 03Aug2009 | 03Aug2009 |
|       |      |       |      |       |      |        |      | 04Aug2009 | 04Aug2009 |
|       |      |       |      |       |      |        |      | 05Aug2009 | 05Aug2009 |
|       |      |       |      |       |      |        |      | 06Aug2009 | 06Aug2009 |
|       |      |       |      |       |      |        |      | 07Aug2009 | 07Aug2009 |
|       |      |       |      |       |      |        |      | 08Aug2009 | 08Aug2009 |
|       |      |       |      |       |      |        |      | 09Aug2009 | 09Aug2009 |
|       |      |       |      |       |      |        |      | 10Aug2009 | 10Aug2009 |
|       |      |       |      |       |      |        |      | 21Aug2009 | 11Aug2009 |
|       |      |       |      |       |      |        |      | 22Aug2009 | 21Aug2009 |
|       |      |       |      |       |      |        |      | 23Aug2009 | 28Aug2009 |
|       |      |       |      |       |      |        |      | 28Aug2009 | 29Aug2009 |
|       |      |       |      |       |      |        |      | 29Aug2009 | 30Aug2009 |
|       |      |       |      |       |      |        |      | 30Aug2009 | 31Aug2009 |
|       |      |       |      |       |      |        |      | 31Aug2009 | 01Aug2010 |
|       |      |       |      |       |      |        |      | 01Aug2010 | 02Aug2010 |
|       |      |       |      |       |      |        |      | 02Aug2010 | 03Aug2010 |
|       |      |       |      |       |      |        |      | 03Aug2010 | 04Aug2010 |

| MPB-1 |      | MPB-2 |      | MPB-3 |      | Ctrl-1 |      | Ctrl-2    |           |
|-------|------|-------|------|-------|------|--------|------|-----------|-----------|
| Terra | Aqua | Terra | Aqua | Terra | Aqua | Terra  | Aqua | Terra     | Aqua      |
|       |      |       |      |       |      |        |      | 04Aug2010 | 05Aug2010 |
|       |      |       |      |       |      |        |      | 05Aug2010 | 06Aug2010 |
|       |      |       |      |       |      |        |      | 06Aug2010 | 07Aug2010 |
|       |      |       |      |       |      |        |      | 07Aug2010 | 08Aug2010 |
|       |      |       |      |       |      |        |      | 08Aug2010 | 09Aug2010 |
|       |      |       |      |       |      |        |      | 09Aug2010 | 18Aug2010 |
|       |      |       |      |       |      |        |      | 10Aug2010 | 19Aug2010 |
|       |      |       |      |       |      |        |      | 18Aug2010 | 20Aug2010 |
|       |      |       |      |       |      |        |      | 19Aug2010 | 21Aug2010 |
|       |      |       |      |       |      |        |      | 20Aug2010 | 22Aug2010 |
|       |      |       |      |       |      |        |      | 21Aug2010 | 23Aug2010 |
|       |      |       |      |       |      |        |      | 22Aug2010 | 06Aug2011 |
|       |      |       |      |       |      |        |      | 23Aug2010 | 03Aug2012 |
|       |      |       |      |       |      |        |      | 04Aug2011 | 08Aug2012 |
|       |      |       |      |       |      |        |      | 09Aug2011 | 09Aug2012 |
|       |      |       |      |       |      |        |      | 13Aug2011 | 10Aug2012 |
|       |      |       |      |       |      |        |      | 26Aug2011 | 11Aug2012 |
|       |      |       |      |       |      |        |      | 27Aug2011 | 12Aug2012 |
|       |      |       |      |       |      |        |      | 09Aug2012 | 17Aug2012 |
|       |      |       |      |       |      |        |      | 10Aug2012 | 19Aug2012 |
|       |      |       |      |       |      |        |      | 11Aug2012 | 20Aug2012 |
|       |      |       |      |       |      |        |      | 12Aug2012 | 21Aug2012 |
|       |      |       |      |       |      |        |      | 13Aug2012 | 22Aug2012 |
|       |      |       |      |       |      |        |      | 17Aug2012 | 27Aug2012 |
|       |      |       |      |       |      |        |      | 19Aug2012 | 28Aug2012 |
|       |      |       |      |       |      |        |      | 20Aug2012 | 29Aug2012 |
|       |      |       |      |       |      |        |      | 21Aug2012 |           |
|       |      |       |      |       |      |        |      | 22Aug2012 |           |
|       |      |       |      |       |      |        |      | 27Aug2012 |           |
|       |      |       |      |       |      |        |      | 28Aug2012 |           |
|       |      |       |      |       |      |        |      | 29Aug2012 |           |
